# Supplementary material for: A near-infrared benzothiazole-based fluorescent probe for selective detection of CORM-3 with a large Stokes shift in living cells
Source: Royal Society of Chemistry journal article supplement (doi:10.1039/d5an01196e), 2025-12-10
Supplement: d5an01196e1.pdf [file d5an01196e1.pdf]

## **A near-infrared benzothiazole-based fluorescent probe for selective detection of CORM-3 with large Stokes shift in living cells**

Liqiang Yan <sup>a\*</sup>, Junjie Yang <sup>a</sup>, Yanxin Zhang <sup>a</sup>, Ying Sun <sup>a</sup>, Jianmei Zou <sup>a\*</sup>

<sup>a</sup>College of Chemistry and Bioengineering, Guilin University of Technology, Guilin 541006, China

\*Corresponding author, E-mail: liqiangyan@glut.edu.cn; 2019136@glut.edu.cn

Table S1. Comparison of the detection performance of the probe with that of some recent probes

| Probes                                                                              | $\lambda_{\text{ex}}$ | $\lambda_{\text{em}}$ | Stokes shift | LOD                 | Linear range         | Metal ions       | Applications                                                                 | Ref.      |
|-------------------------------------------------------------------------------------|-----------------------|-----------------------|--------------|---------------------|----------------------|------------------|------------------------------------------------------------------------------|-----------|
| 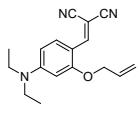   | 430 nm                | 480 nm                | 50 nm        | 4.5 nM              | 0-40 $\mu\text{M}$   | $\text{Pd}^{2+}$ | Cell imaging<br>(Exogenous/Endogenous)<br>Zebrafish                          | 27        |
|    | 620 nm                | 675 nm                | 55 nm        | 58 nM               | 0-300 $\mu\text{M}$  | $\text{Pd}^{2+}$ | Cell imaging<br>(Exogenous/Endogenous)<br>Zebrafish                          | 28        |
|    | 575 nm                | 630 nm                | 55 nm        | 9.4 nM              | 0-70 $\mu\text{M}$   | $\text{Pd}^{2+}$ | Cell imaging<br>(Exogenous/Endogenous)<br>Co-localization<br>Zebrafish       | 29        |
|    | 440 nm                | 533 nm                | 93 nm        | 0.012 $\mu\text{M}$ | 0-100 $\mu\text{M}$  | NO               | Cell imaging<br>(Exogenous/Endogenous)<br>Zebrafish                          | 30        |
|    | 400 nm                | 450 nm                | 50 nm        | 12 nM               | 0-1000 $\mu\text{M}$ | NO               | Cell imaging<br>(Exogenous/Endogenous)s                                      | 31        |
|   | 430 nm                | 541 nm                | 111 nm       | 0.97 nM             | 0-100 $\mu\text{M}$  | NO               | Cell imaging<br>(Exogenous/Endogenous)<br>Zebrafish                          | 32        |
|  | 450 nm                | 590 nm                | 140 nm       | 146 nM              | 0-300 $\mu\text{M}$  | $\text{Fe}^{3+}$ | Cells imaging<br>(Endogenous)<br>Test paper                                  | 33        |
|  | 405 nm                | 470 nm                | 65 nm        | 212 nM              | 0-14 $\mu\text{M}$   | $\text{Pd}^{2+}$ | Cell imaging<br>(Exogenous/Endogenous)<br>Zebrafish                          | 34        |
|  | 396 nm                | 520 nm                | 124 nm       | -                   | -                    | $\text{Cu}^{2+}$ | Cells imaging<br>(Endogenous)                                                | 35        |
|  | 430 nm                | 590 nm                | 160 nm       | 0.86 nM             | 0-100 $\mu\text{M}$  | $\text{Cu}^{2+}$ | Cell imaging<br>(Exogenous/Endogenous)<br>Zebrafish, Mice                    | 36        |
|  | 662 nm                | 743 nm                | 91 nm        | 38 nM               | 0-4 $\mu\text{M}$    | NO               | Cell imaging, zebrafish<br>imaging, zebrafish imaging<br>(Exogenous CORM-3)  | 44        |
|  | 420 nm                | 660 nm                | 240 nm       | 0.14 $\mu\text{M}$  | 0-1200 $\mu\text{M}$ | NO               | Cells imaging<br>(Exogenous/Endogenous)<br>BSA, Test strips, RGB<br>analysis | This work |

## S1 Conventional instruments

$^1\text{H}$  and  $^{13}\text{C}$  NMR spectra were recorded on a Bruker Avance III Ascend spectrometer (500 MHz). Fluorescence spectra were measured with an F98 spectrofluorophotometer (Lengguang Technology, Shanghai, China). High-resolution mass spectrometry (HRMS) analyses were performed on a Waters G2-XS Qtof spectrometer (United States). Solution pH values were determined using a PHS-25 pH meter. Melting points were determined on an SGW X-4 micro melting point apparatus.

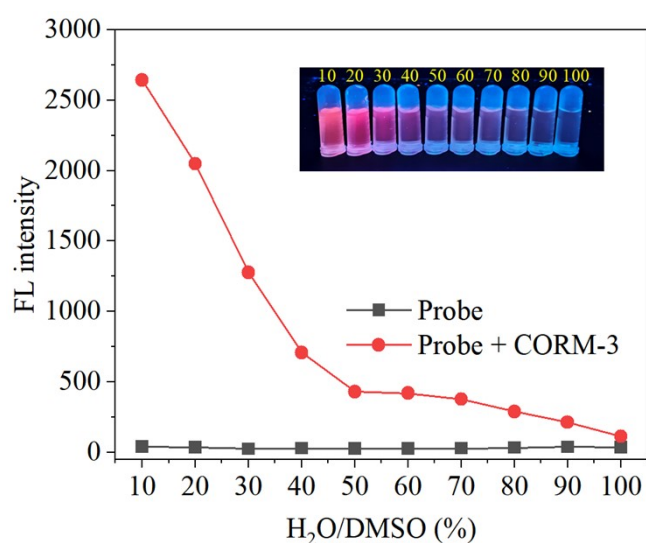

Fig. S1. Before and after the addition of CORM-3 (1 mM), the fluorescence intensity of the probe (10  $\mu\text{M}$ ) varied with the H<sub>2</sub>O/DMSO volume ratio.

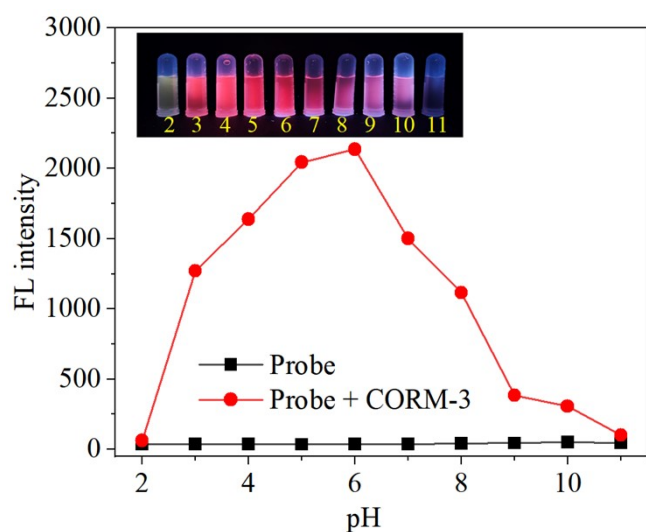

Fig. S2. The effect of pH on the fluorescence intensity of the probe (10  $\mu\text{M}$ ) and CORM-3 (1 mM).

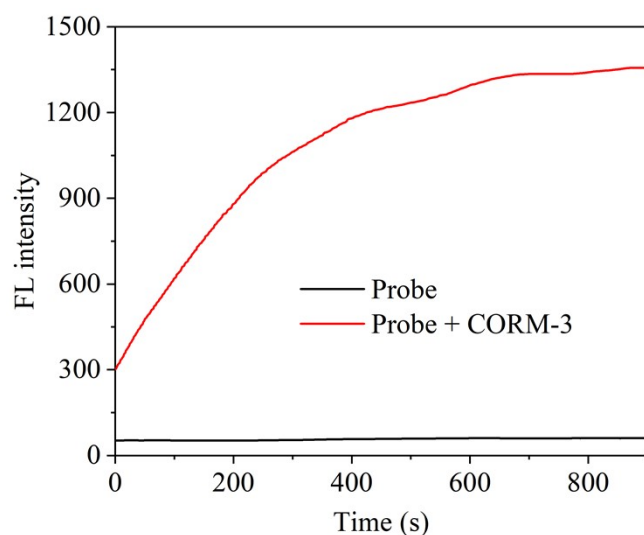

Fig. S3. The variation in the fluorescence intensity of the probe (10  $\mu\text{M}$ ) at 660 nm was monitored over time before and after the addition of CORM-3 (1 mM).

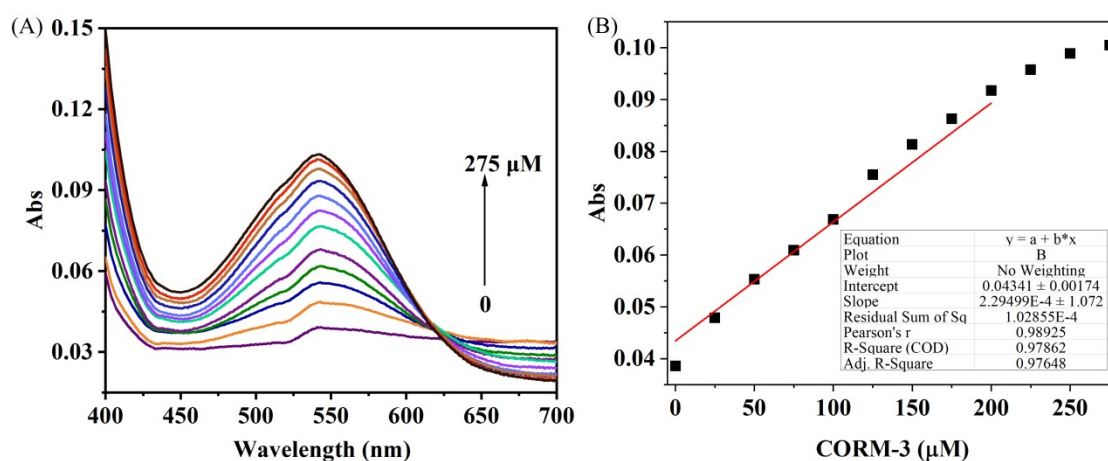

Fig. S4. (A) The ultraviolet-visible absorption spectral changes of the probe (10  $\mu\text{M}$ ) following reaction with varying concentrations of CORM-3 (0, 25, 50, 75, 100, 125, 150, 175, 200, 225, 250, and 275  $\mu\text{M}$ ). (B) The correlation between the absorbance (545 nm) of the probe and the concentration of CORM-3

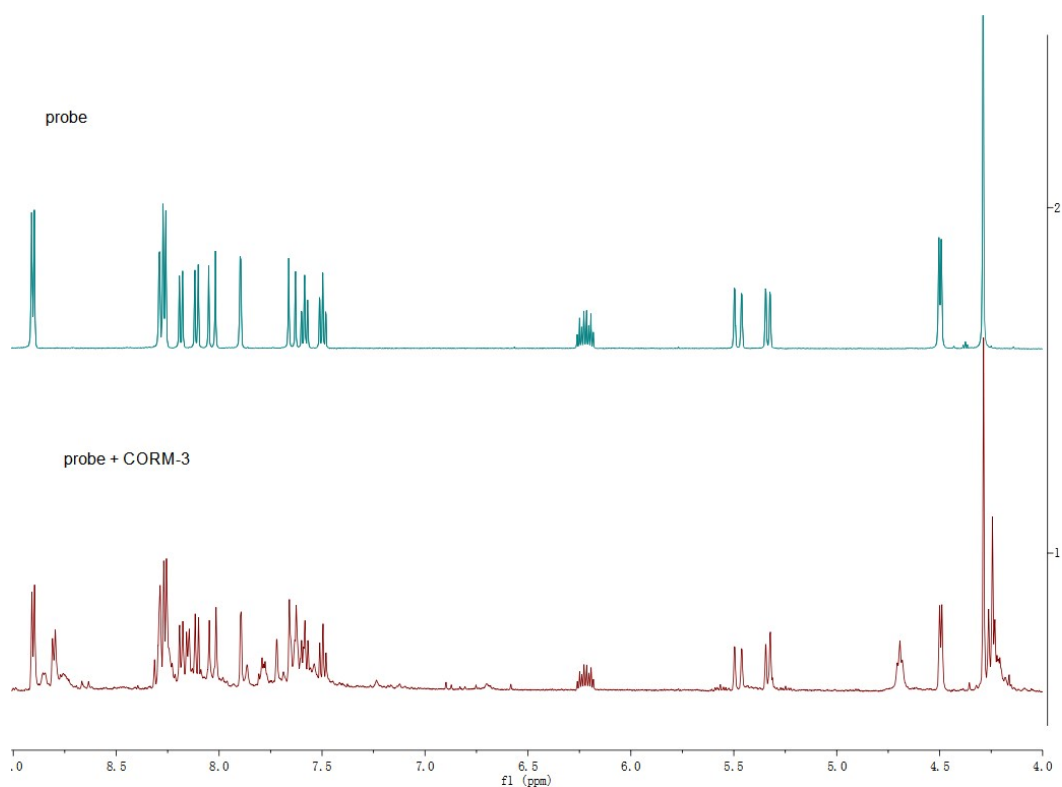

Fig. S5. Comparative analysis of the  $^1\text{H}$  NMR spectra before and after the addition of CORM-3 in  $\text{DMSO}-d_6$ .

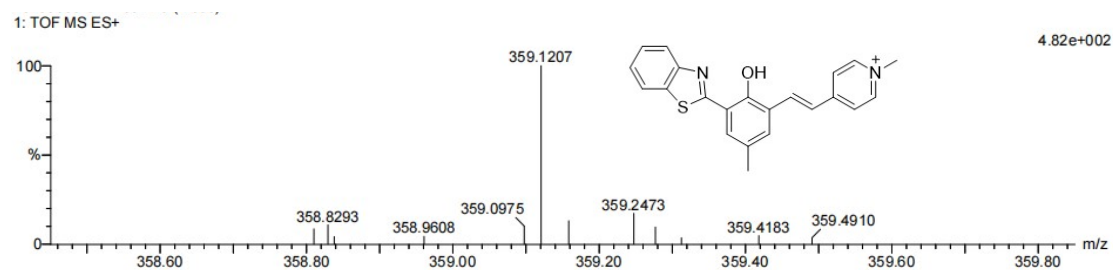

Fig. S6. HRMS of the probe after addition of CORM-3 in  $\text{CH}_3\text{OH}$ .

Table S2. Spiked Recovery values of CORM-3 in bovine serum using the test strips

| Samples | Addition ( $\mu\text{M}$ ) | Detection( $\mu\text{M}$ ) | Recovery (%) | RSD (%) |
|---------|----------------------------|----------------------------|--------------|---------|
| BSA     | 100                        | $104.7 \pm 5.6$            | 104.7        | 5.3     |
|         | 200                        | $200.6 \pm 7.2$            | 100.3        | 3.6     |
|         | 400                        | $421.3 \pm 10.5$           | 105.3        | 2.5     |

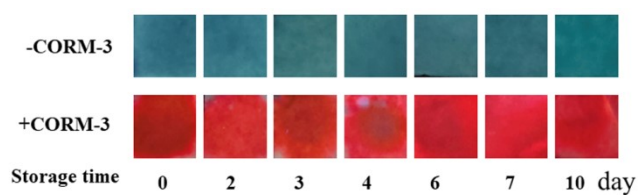

Fig. S7. The detection effect of the test paper for CORM-3 was evaluated under 365 nm ultraviolet light after a period of storage.

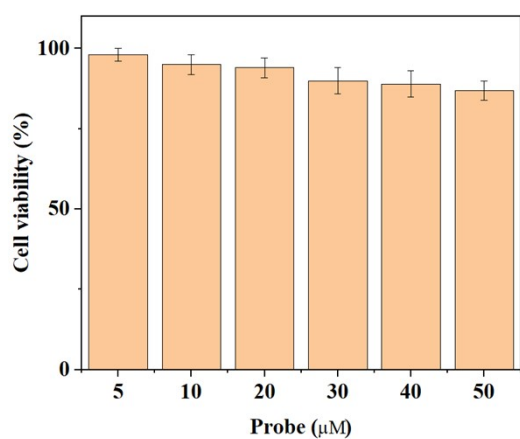

Fig. S8. Cell viability effect of the probe on HeLa cells after 12 h-incubation.

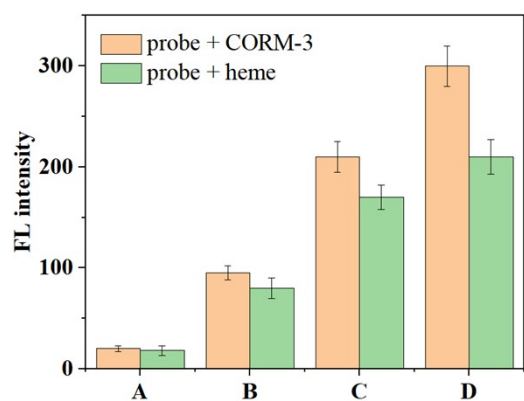

Fig. S9. Intensity of fluorescence imaging of HeLa cells. Orange columns: The probe (20 μM) with CORM-3 at different concentrations of 0 (A), 25 (B), 100 (C), and 300 μM (D). Pale green columns: The probe (20 μM) with heme (100 μM) for varying durations, 0 h (A), 0.5 h (B), 4 h (C), and 10 h (D).

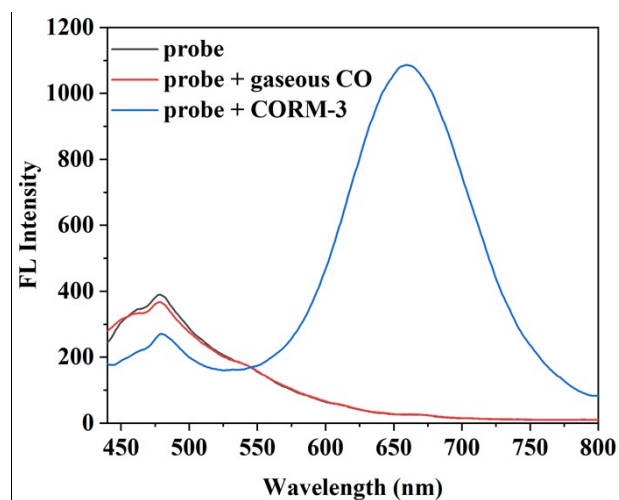

Fig. S10. Fluorescence spectra of the probe (10  $\mu$ M) after interaction with the gaseous CO (generated by the reaction between formic acid and concentrated sulfuric acid) and the CO-release agent CORM-2 (1.0 mM).

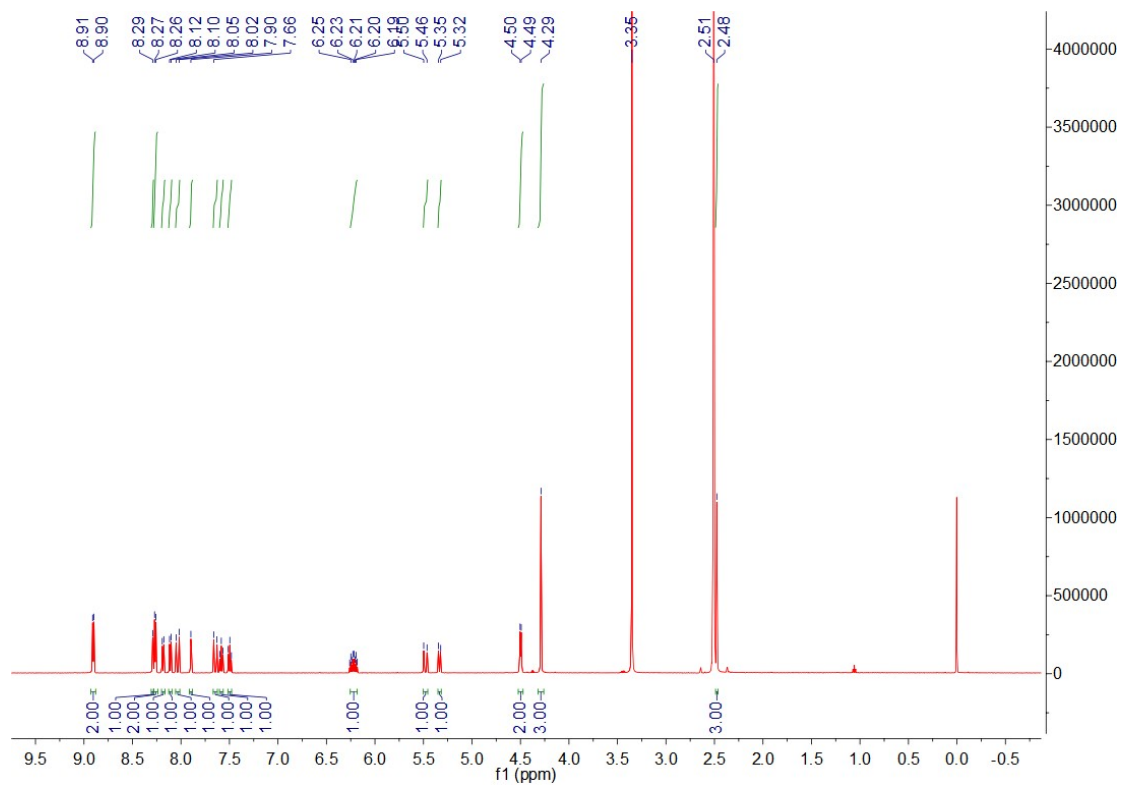

Fig. S11. <sup>1</sup>H NMR of the probe in DMSO-*d*<sub>6</sub>.

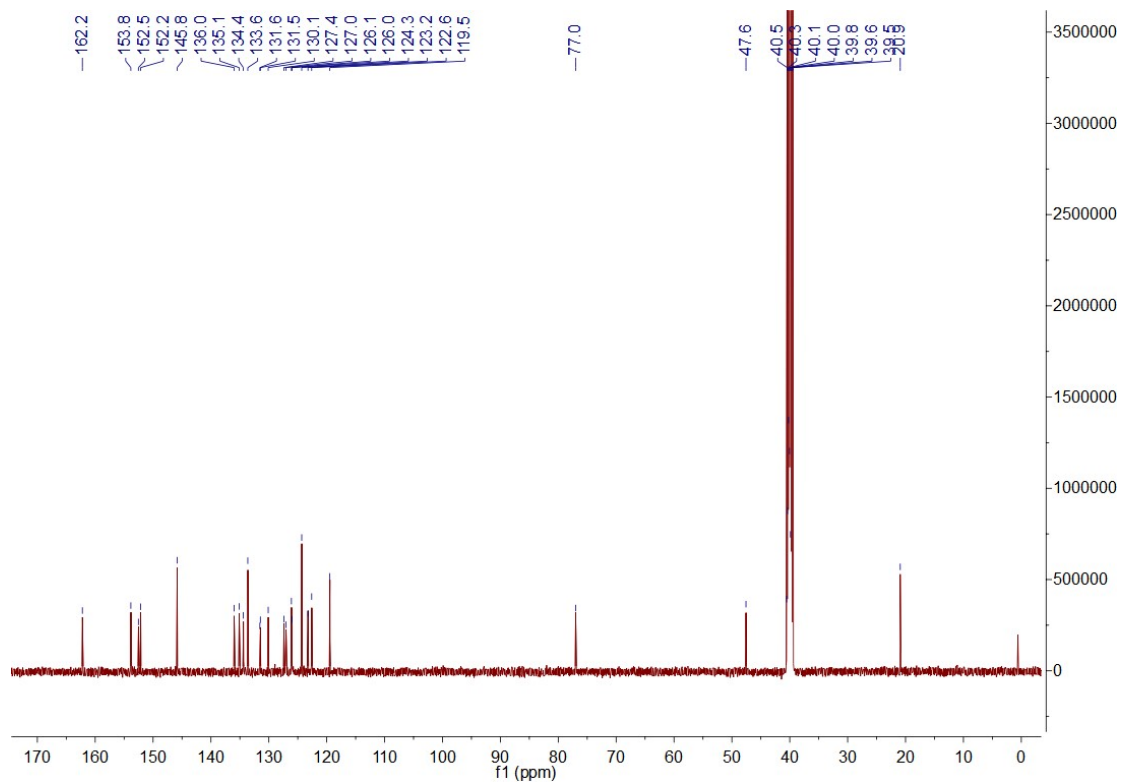

Fig. S12.  $^{13}\text{C}$  NMR of the probe in  $\text{DMSO}-d_6$ .

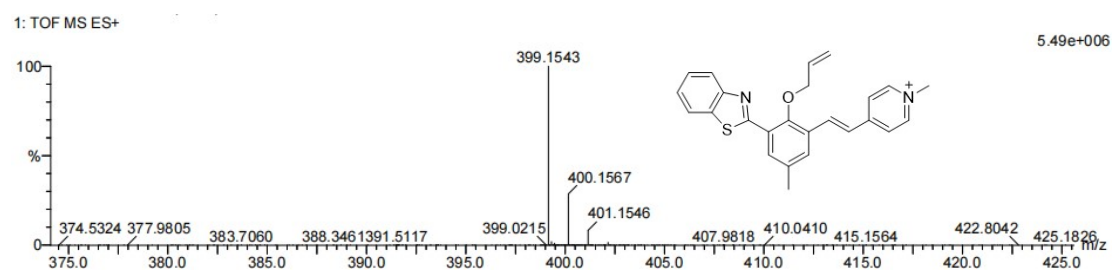

Fig. S13. HRMS of the probe in  $\text{CH}_3\text{OH}$ .
